# Supplementary material
Source: PubMed Central journal article supplement (PMC5009405)
Supplement: ajtr0008-3530-f5.pdf [file ajtr0008-3530-f5.pdf]

## AR relation with diabetes in TNBC

**Supplementary Table 1.** Clinical pathological features of TNBC samples

|                   | Patients (n=238) |
|-------------------|------------------|
| <b>Age</b>        |                  |
| <40               | 26 (10.9%)       |
| ≥40≤60            | 107 (45.0%)      |
| >60               | 101 (42.4%)      |
| Unknown           | 4 (1.7%)         |
| <b>Grade</b>      |                  |
| I-II              | 28 (11.8%)       |
| III               | 197 (82.8%)      |
| Unknown           | 13 (5.5%)        |
| <b>Size (T)</b>   |                  |
| ≤2 cm             | 102 (42.9%)      |
| >2≤5 cm           | 103 (43.3%)      |
| >5                | 20 (8.4%)        |
| Unknown           | 13 (5.5%)        |
| <b>LNM</b>        |                  |
| Yes               | 81 (34.0%)       |
| No                | 111 (46.6%)      |
| Unknown           | 46 (19.3%)       |
| <b>Metastasis</b> |                  |
| Yes               | 42 (17.6%)       |
| No                | 131 (55.0%)      |
| Unknown           | 65 (27.3%)       |
| <b>Ki-67</b>      |                  |
| >20               | 186 (78.2%)      |
| ≤20               | 42 (17.6%)       |
| Unknown           | 10 (4.2%)        |
| <b>BMI</b>        |                  |
| <30               | 72 (30.3%)       |
| ≥30               | 36 (15.1%)       |
| Unknown           | 130 (54.6%)      |
| <b>Diabetic</b>   |                  |
| Yes               | 17 (7.1%)        |
| No                | 98 (41.2%)       |
| Unknown           | 123 (51.7%)      |
| <b>Follow up</b>  |                  |
| NED               | 63 (26.5%)       |
| AWD               | 24 (10.1%)       |
| DOD               | 16 (6.7%)        |
| Unknown           | 135 (56.7%)      |

LNM=Lymph node metastasis; NED=No evidence of disease; AWD=Alive with disease; DOD=Dead of disease.
